# Supplementary figures and images for: Antimicrobial and pro-angiogenic properties of soluble and nanoparticle-immobilized LL37 peptides
Source: Royal Society of Chemistry journal article supplement (doi:10.1039/d1bm01034d), 2021-01-01

## Figure S1

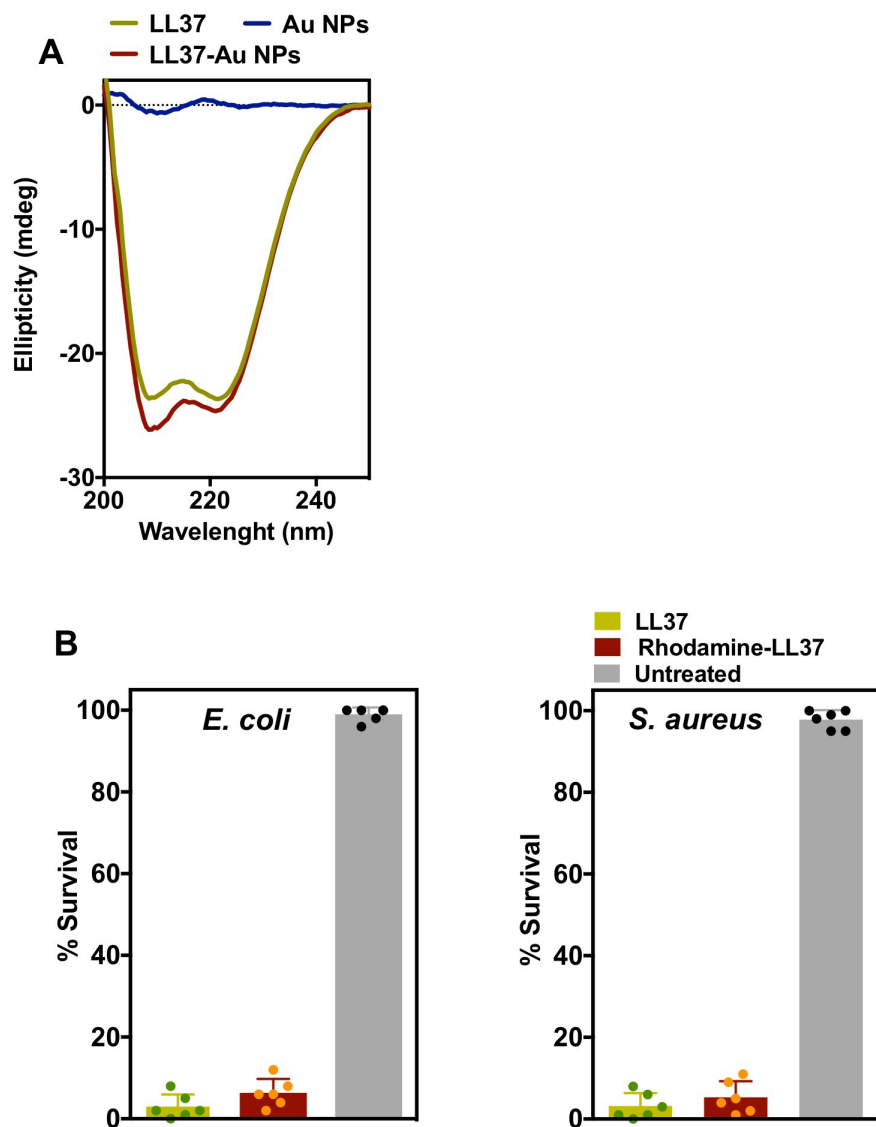

Supplement: d1bm01034d1.pdf [file d1bm01034d1.pdf]

## Figure S3

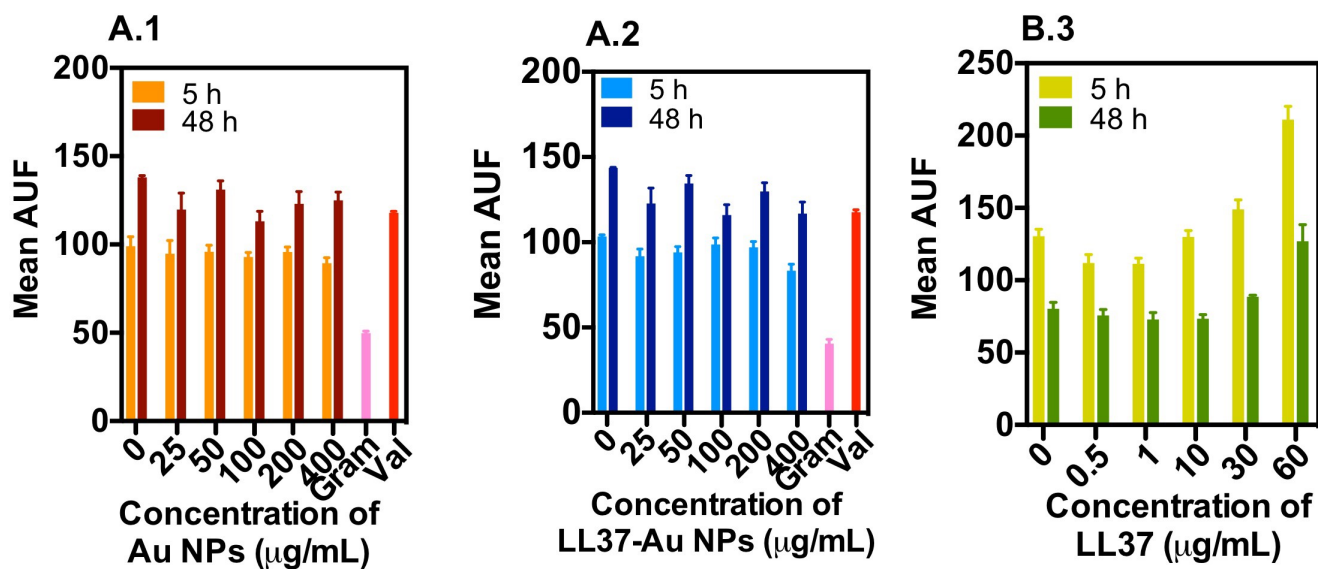

Supplement: d1bm01034d3.pdf [file d1bm01034d3.pdf]

## Figure S5

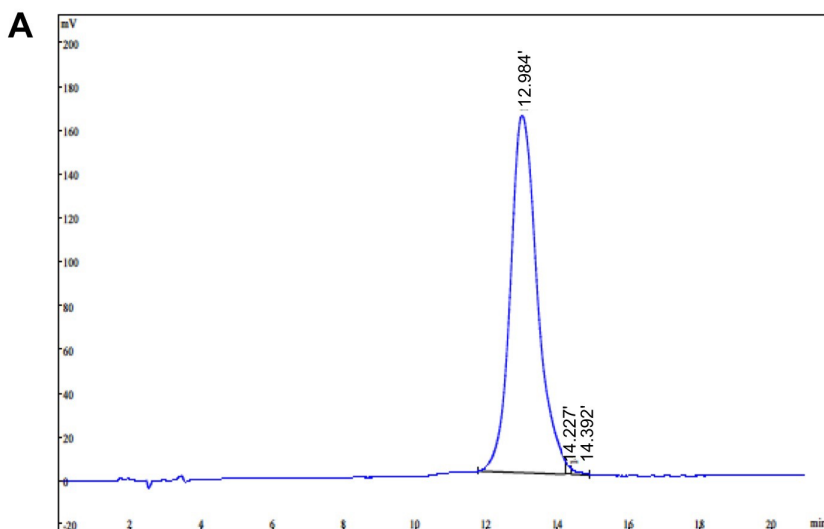

**Peak Results**

| Rank  | Time   | Conc.  | Area    | Height |
|-------|--------|--------|---------|--------|
| 1     | 12.984 | 99.32  | 8425025 | 162932 |
| 2     | 14.227 | 0.3927 | 33309   | 4782   |
| 3     | 14.392 | 0.2862 | 24280   | 2099   |
| Total |        | 100    | 8482614 | 169813 |

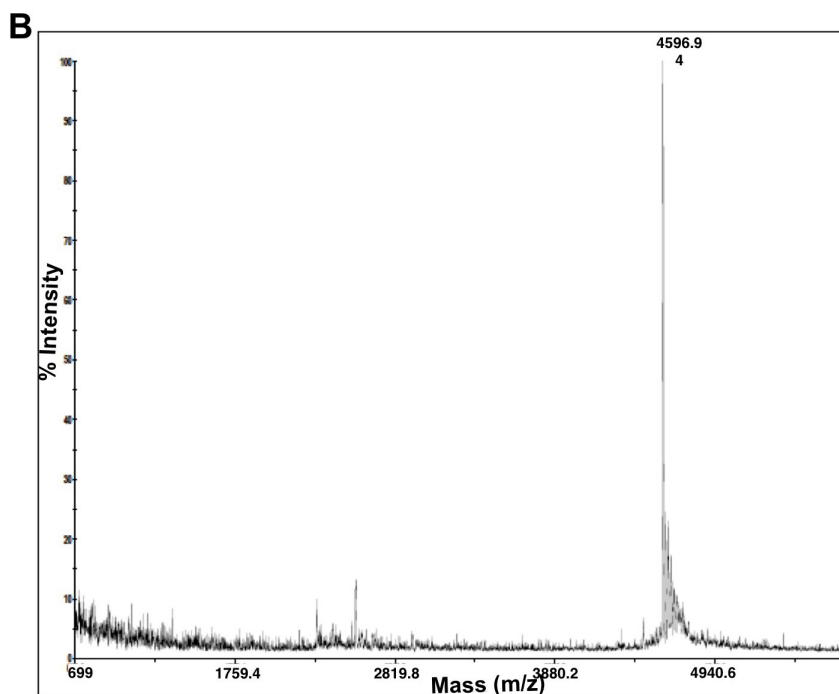

Supplement: d1bm01034d5.pdf [file d1bm01034d5.pdf]
